# Supplementary material for: The impact of the introduction of ten- or thirteen-valent pneumococcal conjugate vaccines on antimicrobial-resistant pneumococcal disease and carriage: A systematic literature review
Source: PubMed Central journal article supplement (PMC9936452; doi:10.7189/jogh.13.05001), 2023-02-17
Supplement: jogh-13-05001-s001.pdf [file jogh-13-05001-s001.pdf]

## ONLINE SUPPLEMENTARY DOCUMENT

**Title:** The impact of the introduction of ten- or thirteen-valent pneumococcal conjugate vaccines on antimicrobial-resistant pneumococcal disease and carriage:  
a systematic literature review

**Authors:** Rita Reburn<sup>1\*</sup>, Jaclyn Maher<sup>2</sup>, Claire von Mollendorf<sup>1,3</sup>, Amanda Gwee<sup>1,3,4</sup>, Kim Mulholland<sup>1,3,5</sup> and Fiona Russell<sup>1,3</sup>

Table S1. Medline search strategy

| MEDLINE Search Strategy                                                                                                                                                                                                                                                                                                                                                                       |
|-----------------------------------------------------------------------------------------------------------------------------------------------------------------------------------------------------------------------------------------------------------------------------------------------------------------------------------------------------------------------------------------------|
| 1. exp *Pneumonia/                                                                                                                                                                                                                                                                                                                                                                            |
| 2. ((lower-respiratory adj3 infection*) or pneumonia or pneumonias or lung-inflammation* or lobitis or nonspecific-inflammatory-lung-disease* or peripneumonia or pleuropneumonia or pleuropneumonitis or pneumonic-lung* or pneumonic-pleurisy or pneumonic-pleuritis or pneumonitides or pneumonitis or pulmonal-inflammation* or pulmonary-inflammation* or pulmonic-inflammation*).tw,kf. |
| 3. *pneumococcal infections/                                                                                                                                                                                                                                                                                                                                                                  |
| 4. *Streptococcus infections/                                                                                                                                                                                                                                                                                                                                                                 |
| 5. 1 or 2 or 3 or 4                                                                                                                                                                                                                                                                                                                                                                           |
| 6. exp *Pneumococcal Vaccines/                                                                                                                                                                                                                                                                                                                                                                |
| 7. exp *Immunization/                                                                                                                                                                                                                                                                                                                                                                         |
| 8. (pnu-im?une or pneim?une or pcv10 or pcv-10 or pcv13 or pcv-13 or prevenar13 or prevenar-13 or prevnar13 or prevnar-13 or synflorix).tw,kf.                                                                                                                                                                                                                                                |
| 9. ((10-valent or ten-valent or 13-valent or thirteen-valent) and (pneumococcal adj5 vaccine*)).tw,kf.                                                                                                                                                                                                                                                                                        |
| 10. Immunization Programs/                                                                                                                                                                                                                                                                                                                                                                    |
| 11. 6 or 7 or 8 or 9 or 10                                                                                                                                                                                                                                                                                                                                                                    |
| 12. *pharynx/ or exp *nasopharynx/                                                                                                                                                                                                                                                                                                                                                            |
| 13. exp *Otitis Media/                                                                                                                                                                                                                                                                                                                                                                        |
| 14. *Carrier State/                                                                                                                                                                                                                                                                                                                                                                           |

15. exp \*Microbial Sensitivity Tests/
16. exp \*Drug Resistance, Microbial/
17. (resistance or resistant or susceptib\* or sensitivit\* or nonsusceptib\* or non-susceptib\* or nasopharyn\* or pharyn\* or carrier\* or carriage\* or otitis-media or invasive).tw,kf.
18. 12 or 13 or 14 or 15 or 16 or 17
19. 5 and 11 and 18
20. randomized controlled trial.pt.
21. exp randomized controlled trial/
22. exp case-control studies/
23. (exp animals/ or (rat or rats or mouse or mice or swine or porcine or murine or sheep or lamb or lambs or pig or pigs or piglet or piglets or rabbit or rabbits or cat or cats or dog or dogs or cattle or bovine or monkey or monkeys or trout or marmoset or marmosets).ti.) not human\*.sh.
24. limit 19 to (case reports or comment or editorial or guideline or letter or practice guideline)
25. 19 not (20 or 21 or 22 or 23 or 24)
26. . limit 25 to yr="2017 -Current"

Table S2. Study characteristics for studies assessing antimicrobial resistance or non-susceptibility in invasive pneumococcal isolates

| Study ID                             | First author, year of publication | Title                                                                                                   | WHO region | Country    | Study population                                                                                                                                                           | Study design                                     | Data collection period | Age group       | Number and type of pneumococcal isolates/infections | Clinical and Laboratory Standards Institute used | PCV10 or PCV13 | PCV schedule and catch up | Years in the pre-PCV10/13 period | Years in the post-PCV10/13 period | Quality assessment |
|--------------------------------------|-----------------------------------|---------------------------------------------------------------------------------------------------------|------------|------------|----------------------------------------------------------------------------------------------------------------------------------------------------------------------------|--------------------------------------------------|------------------------|-----------------|-----------------------------------------------------|--------------------------------------------------|----------------|---------------------------|----------------------------------|-----------------------------------|--------------------|
| <b>Low income countries</b>          |                                   |                                                                                                         |            |            |                                                                                                                                                                            |                                                  |                        |                 |                                                     |                                                  |                |                           |                                  |                                   |                    |
| 7                                    | Darboe, 2019 [17]                 | Community-acquired Invasive Bacterial Disease in Urban Gambia, 2005-2015: a hospital-based surveillance | AFRO       | The Gambia | Rural catchment population of the Medical Research Council Unit, The Gambia at the London School of Hygiene and Tropical Medicine, situated 12 km from the capital, Banjul | Before-after retrospective hospital-based cohort | 2005-2015              | All ages        | 242 pneumococcal isolates                           | Yes                                              | PCV13          | 3 + 0                     | 2005-2009                        | 2012-2015                         | Moderate           |
| <b>Upper middle income countries</b> |                                   |                                                                                                         |            |            |                                                                                                                                                                            |                                                  |                        |                 |                                                     |                                                  |                |                           |                                  |                                   |                    |
| 3                                    | Berezin, 2019 [13]                | Invasive pneumococcal disease among hospitalized children in Brazil before and after the                | PAHO       | Brazil     | Urban population <17 years catchment for two hospitals in São Paulo and Uberlândia, each                                                                                   | Before-after retrospective hospital-based cohort | 2005-2015              | <5years, 6-16 y | 260 patients with IPD and positive                  | Yes                                              | PCV10          | 2 + 1, no catch up        | 2005-2009                        | 2011-2015                         | Moderate           |

|    |                           |                                                                                                                                                                                              |      |                  |                                                                                                                                                         |                                                    |           |                                 |                                                                              |            |                                            |                                       |                                                                                                                                                                                        |                                                                            |          |
|----|---------------------------|----------------------------------------------------------------------------------------------------------------------------------------------------------------------------------------------|------|------------------|---------------------------------------------------------------------------------------------------------------------------------------------------------|----------------------------------------------------|-----------|---------------------------------|------------------------------------------------------------------------------|------------|--------------------------------------------|---------------------------------------|----------------------------------------------------------------------------------------------------------------------------------------------------------------------------------------|----------------------------------------------------------------------------|----------|
|    |                           | introduction of a pneumococcal conjugate vaccine                                                                                                                                             |      |                  | with an average 3000 annual paediatric admissions                                                                                                       |                                                    |           |                                 | pneumococcal isolates                                                        |            |                                            |                                       |                                                                                                                                                                                        |                                                                            |          |
| 5  | Cassiolato, 2018 [15]     | Expansion of the multidrug-resistant clonal complex 320 among invasive Streptococcus pneumoniae serotype 19A after the introduction of a ten-valent pneumococcal conjugate vaccine in Brazil | PAHO | Brazil           | National population of all ages. National Reference laboratory for IPD receiving data from 25 public health laboratories located in 25 Brazilian states | Before-after retrospective laboratory-based cohort | 2005-2017 | <5 y, 5-49 y, ≥50 y             | A total of 9852 IPD isolates, of which 6.8% (n = 673/9852) were serotype 19A | Not stated | PCV10                                      | 2 + 1, no catch up                    | 2005-2009                                                                                                                                                                              | 2011-2017                                                                  | Moderate |
| 6  | Cho, 2017 [16]            | Redistribution of Streptococcus pneumoniae Serotypes after Nationwide 13-Valent Pneumococcal Conjugate Vaccine Program in Children in Northern Taiwan                                        | WPRO | Taiwan (China)   | Urban population <18 y in catchment area of Mackay Memorial Hospital and National Taiwan University Hospital                                            | Before-after retrospective hospital-based cohort   | 2010-2015 | <12 mo, 12-24 mo, 2-5 y, 5-18 y | 114 IPD isolates                                                             | Yes        | PCY13                                      | 2 + 1, catch up for 1-5 y             | 2010-2012 PCV7/PCV13 were provided free-of-charge only for children ≤5 y of age with high risks (i.e. certain underlying diseases or low socioeconomic status) and available privately | 2013-2015 PCV13 was publicly funded for all 1-5 y with a catch up campaign | Moderate |
| 8  | Diawara, 2017 [18]        | Molecular characterization of penicillin non-susceptible Streptococcus pneumoniae isolated before and after pneumococcal conjugate vaccine implementation in Casablanca, Morocco             | EMRO | Morocco          | Isolates from the Microbiology Laboratory of Ibn Rochd University Hospital Centre of Casablanca, population not described                               | Before-after retrospective laboratory-based cohort | 2007-2014 | 0-14 y                          | 361 IPD isolates                                                             | Yes        | PCV13 in 2010, PCV10 in 2013               | 2 + 1, no catch up                    | 2007-2010                                                                                                                                                                              | 2011-2014                                                                  | Moderate |
| 9  | Echaniz-Aviles, 2019 [19] | Clinical and microbiological characteristics of community-acquired pneumonia associated with Streptococcus pneumoniae in adult patients in Mexico                                            | PAHO | Mexico           | Patients who presented to three tertiary care hospitals                                                                                                 | Before-after retrospective hospital-based cohort   | 2000-2015 | All ages                        | 96 IPD isolates                                                              | Yes        | PCV7 in 2008, PCV13 in 2012                | Not described                         | 2000-2007                                                                                                                                                                              | 2008-2015                                                                  | Moderate |
| 11 | Gagetti, 2017 [21]        | Characterization of Streptococcus pneumoniae invasive serotype 19A isolates from Argentina (1993-2014)                                                                                       | PAHO | Argentina        | Samples received by the National Reference Laboratory (NRL) 101 hospitals in 20 provinces and Buenos Aires city                                         | Before-after retrospective laboratory-based cohort | 1993-2014 | Children <6 y                   | 176 IPD isolates serotype 19A                                                | Yes        | PCV13 in 2012                              | 2 + 1, catch-up campaign for 12-24 mo | 1993-2011                                                                                                                                                                              | 2012-2014                                                                  | Moderate |
| 13 | Ho, 2019 [22]             | Increase in incidence of invasive pneumococcal disease caused by serotype three in children eight years after the introduction of the pneumococcal conjugate vaccine in Hong Kong            | WPRO | Hong Kong, China | Isolates captured as clinical laboratories providing service to hospitalised patients                                                                   | Before-after retrospective laboratory-based cohort | 1995-2017 | Children <5 y                   | 265 IPD isolates                                                             | Yes        | PCV7 in 2009, PCV10 in 2010, PCV13 in 2011 | 3 + 1, catch-up campaign for <2 y     | 1995-2004 (no PCV available)                                                                                                                                                           | 2015-2017 (PCV13 only)                                                     | Moderate |
| 15 | Huang, 2019 [24]          | Respiratory pathogens – Some altered antibiotic susceptibility after implementation of pneumococcus vaccine and antibiotic control strategies                                                | WPRO | Taiwan, China    | Isolates from children <18 y admitted at Taichung Veterans General Hospital (TCVGH), a tertiary-care referral centre with 1555 beds                     | Before-after retrospective laboratory-based cohort | 2008-2017 | Children <18 y                  | 449 IPD isolates                                                             | Yes        | PCV13 in 2013                              | 2 + 1, catch up <5 y                  | 2008-2012                                                                                                                                                                              | 2016-2017                                                                  | Moderate |
| 21 | Mott, 2019 [29]           | Emergence of serotype 19A Streptococcus pneumoniae after PCV10 associated with a ST320 in adult population, in Porto Alegre, Brazil                                                          | PAHO | Brazil           | Isolates were obtained from three hospitals in Porto Alegre (metropolitan area with more than four million                                              | Before-after retrospective hospital-based cohort   | 2008-2014 | All ages                        | 36 IPD serotype 19A isolates                                                 | Yes        | PCV10                                      | 2 + 1, no catch up                    | 2008-2009                                                                                                                                                                              | 2011-2014                                                                  | Moderate |

|                              |                            |                                                                                                                                                                                                                       |      |         |                                                                                                                                                                                                                 |                                                                                |           |                                                   |                                          |            |                                                       |                                        |                            |                        |          |
|------------------------------|----------------------------|-----------------------------------------------------------------------------------------------------------------------------------------------------------------------------------------------------------------------|------|---------|-----------------------------------------------------------------------------------------------------------------------------------------------------------------------------------------------------------------|--------------------------------------------------------------------------------|-----------|---------------------------------------------------|------------------------------------------|------------|-------------------------------------------------------|----------------------------------------|----------------------------|------------------------|----------|
|                              |                            |                                                                                                                                                                                                                       |      |         | inhabitants), South Brazil                                                                                                                                                                                      |                                                                                |           |                                                   |                                          |            |                                                       |                                        |                            |                        |          |
| 22                           | Neves, 2018 [40]           | Population structure of <i>Streptococcus pneumoniae</i> colonizing children before and after universal use of pneumococcal conjugate vaccines in Brazil: Emergence and expansion of the MDR serotype 6C-CC386 lineage | PAHO | Brazil  | Pneumococcal isolates recovered from samples taken from the nasopharynx of children from seven institutions distributed across five different neighbourhoods in Niterói city, Rio de Janeiro state, Brazil      | Before-after retrospective health facility-based cohort                        | 2009-2014 | All ages                                          | 36 IPD serotype 19A isolates             | Yes        | PCV10                                                 | 2 + 1, no catch up                     | 2009-2019                  | 2014                   | Moderate |
| <b>High income countries</b> |                            |                                                                                                                                                                                                                       |      |         |                                                                                                                                                                                                                 |                                                                                |           |                                                   |                                          |            |                                                       |                                        |                            |                        |          |
| 1                            | Ando, 2020 [11]            | The prevalence and antimicrobial susceptibility of <i>Streptococcus pneumoniae</i> isolated from patients at Jikei University Hospitals after the implementation of the pneumococcal vaccination program in Japan     | WPRO | Japan   | Urban population catchment for four Jikei University Hospitals                                                                                                                                                  | Before-after retrospective hospital-based cohort                               | 2009-2017 | All ages                                          | 5763 IPD isolates                        | Not stated | PCV13 (following PCV7)                                | 3 + 1, no catch up                     | 3 y (2009-2011)            | 4 y (2014-2017)        | Moderate |
| 2                            | Ben-Shimol, 2018 [12]      | Impact of pneumococcal conjugate vaccines introduction on antibiotic resistance of <i>Streptococcus pneumoniae meningitis</i> in children aged five years or younger, Israel, 2004 to 2016                            | EURO | Israel  | All children <5 y in Israel, 2016 population = 875 000                                                                                                                                                          | Before-after prospective, nationwide, population-based and active surveillance | 2000-2016 | Children <5 y                                     | 325 pneumococcal meningitis cases        | Yes        | PCV13 (following PCV7), 80-95% PCV13 vaccine coverage | 2 + 1, no catch up                     | 5 y (2004-2008)            | 2014-2016              | Moderate |
| 4                            | Berger, 2018 [14]          | Paediatric community-acquired bacteraemia, pneumococcal invasive disease and antibiotic resistance fell after the pneumococcal conjugate vaccine was introduced                                                       | EURO | Israel  | Urban population <18 y from 3 children's hospitals in Tel Aviv and Jerusalem                                                                                                                                    | Before-after retrospective hospital-based cohort                               | 2007-2015 | <18 y                                             | 238 community-acquired bacteraemia cases | Yes        | PCV13 (following PCV7), 80-95% PCV13 vaccine coverage | 2 + 1, no catch up                     | 2007-2009                  | 2010-2015              | Moderate |
| 10                           | Furuya, 2017 [20]          | Impact of the pneumococcal conjugate vaccine on serotype distribution of adult non-invasive <i>Streptococcus pneumoniae</i> isolates in Tokai region, Japan, 2008-2016                                                | WPRO | Japan   | Adult patients (>16 y) at 10 hospitals in Gifu or Aichi                                                                                                                                                         | Before-after retrospective hospital-based cohort                               | 2008-2016 | Adults >16 y                                      | 504 IPD                                  | Yes        | PCV7 in 2010, PCV13 in 2013                           | Not described                          | 2008-2009                  | 2015-2016              | Moderate |
| 12                           | Gaviria-Agudelo, 2017 [41] | The Effect of 13-Valent Pneumococcal Conjugate Vaccine on the Serotype Distribution and Antibiotic Resistance Profiles in Children With Invasive Pneumococcal Disease                                                 | PAHO | USA     | Child patients < 18 y at the Children's Medical Center Dallas (CMCD)                                                                                                                                            | Before-after retrospective laboratory-based cohort                             | 1999-2014 | Children <18 y                                    | 770 IPD isolates                         | Yes        | PCV7 in 2007, PCV13 in 2010                           | 3 + 1, catch up campaign not described | January 1999-December 2000 | January 2011-June 2014 | Moderate |
| 17                           | Koutouzis, 2018 [26]       | Characteristics of <i>Streptococcus pneumoniae</i> serotype 19A isolates from children in the pre and post Conjugate Vaccine Era. Single center experience 1986-2015                                                  | EURO | Greece  | IPD and non-IPD in children from a tertiary care children's hospital located in Athens, Greece                                                                                                                  | Before-after retrospective hospital-based cohort                               | 1986-2015 | States children but does not provide specific age | 210 IPD serotype 19A                     | Yes        | PCV7 in 2006, PCV10 and PCV13 in 2010                 | Not stated                             | 1986-2005                  | 2011-2015              | Moderate |
| 24                           | Quirk, 2018 [30]           | Vaccination of Icelandic children with the 10-valent pneumococcal vaccine leads to a significant herd effect among adults in Iceland                                                                                  | EURO | Iceland | All pneumococci isolated from lower respiratory tract samples taken from adults with suspected pneumonia and submitted to the Department of Clinical Microbiology at Landspítali University Hospital in Iceland | Before-after retrospective hospital-based cohort                               | 2009-2017 | Adults >18 y                                      | 797 IPD isolates                         | Not stated | PCV13 in 2011                                         | 2 + 1                                  | 2009-2011                  | 2012-2017              | Moderate |
| 25                           | Ricketson, 2018 [31]       | Changes in the nature and severity of invasive pneumococcal disease in children before and after the seven-                                                                                                           | PAHO | Canada  | All children <18 y of age presenting to a healthcare center in the                                                                                                                                              | Before-after retrospective                                                     | 2000-2015 | Children <18 y                                    | 285 IPD isolates                         | Not stated | PCV13                                                 | 3 + 1                                  | 2000-September 2002        | 2010-2015              | Moderate |

|                                                      |                  |                                                                                                                                                                                                             |                        |                                                                  |                                                                                                |                                                                           |           |                    |                     |            |                             |                   |                   |                   |          |
|------------------------------------------------------|------------------|-------------------------------------------------------------------------------------------------------------------------------------------------------------------------------------------------------------|------------------------|------------------------------------------------------------------|------------------------------------------------------------------------------------------------|---------------------------------------------------------------------------|-----------|--------------------|---------------------|------------|-----------------------------|-------------------|-------------------|-------------------|----------|
|                                                      |                  | valent and thirteen-valent pneumococcal conjugate vaccine programs in Calgary, Canada                                                                                                                       |                        |                                                                  | Calgary Zone of Alberta Health Services                                                        | hospital-based cohort                                                     |           |                    |                     |            |                             |                   |                   |                   |          |
| 28                                                   | Siira, 2020 [34] | Antimicrobial susceptibility and clonality of Streptococcus pneumoniae isolates recovered from invasive disease cases during a period with changes in pneumococcal childhood vaccination, Norway, 2004-2016 | EURO                   | Norway                                                           | IPD surveillance data from the Norwegian Surveillance System for Communicable Diseases (MSIS). | Before-after retrospective population-based cohort                        | 2004-2016 | All ages           | 10 239 IPD isolates | Not stated | PCV7 in 2006, PCV13 in 2011 | 2 + 1             | 2004-2005         | 2012-2016         | Moderate |
| <b>Multiple income status countries in one study</b> |                  |                                                                                                                                                                                                             |                        |                                                                  |                                                                                                |                                                                           |           |                    |                     |            |                             |                   |                   |                   |          |
| 18                                                   | Lo, 2019 [27]    | Pneumococcal lineages associated with serotype replacement and antibiotic resistance in childhood invasive pneumococcal disease in the post-PCV13 era: an international whole-genome sequencing study       | WPRO, EURO, AFRO, PAHO | Hong Kong, Israel, Malawi, South Africa, The Gambia, and the USA | IPD in children from hospitals and laboratories in six countries                               | Multisite before-after retrospective hospital and laboratory-based cohort | 1995-2015 | Children aged <3 y | 2391 IPD isolates   | Yes        | Varied by country           | Varied by country | Varied by country | Varied by country | Moderate |

PCV – pneumococcal conjugate vaccine, IPD – invasive pneumococcal disease, AFRO – World Health Organization African Region, AMRO – World Health Organization Region of the Americas, SEARO – World Health Organization South-East Asian Region, EURO – World Health Organization European Region, EMRO – World Health Organization Eastern Mediterranean Region, WPRO – World Health Organization Western Pacific Region, y – years, mo – months

Table S3. Study characteristics for studies assessing antimicrobial resistance or non-susceptibility in otitis media isolates

| Study ID                     | First author, year of publication | Title                                                                                                                                                                                                                | WHO Region | Country | Study population                                                                                                            | Study design                                        | Data collection period | Age group      | Number and type of pneumococcal isolates /infections       | Clinical and Laboratory Standards Institute (CLSI) used | PCV10 or PCV13 and vaccine coverage | PCV schedule and catch up | Years in the pre-PCV10/13 period | Years in the post-PCV10/13 period | Quality assessment |
|------------------------------|-----------------------------------|----------------------------------------------------------------------------------------------------------------------------------------------------------------------------------------------------------------------|------------|---------|-----------------------------------------------------------------------------------------------------------------------------|-----------------------------------------------------|------------------------|----------------|------------------------------------------------------------|---------------------------------------------------------|-------------------------------------|---------------------------|----------------------------------|-----------------------------------|--------------------|
| <b>High income countries</b> |                                   |                                                                                                                                                                                                                      |            |         |                                                                                                                             |                                                     |                        |                |                                                            |                                                         |                                     |                           |                                  |                                   |                    |
| 14                           | Hoshino, 2017 [23]                | Analysis of Streptococcus pneumoniae and Haemophilus influenzae isolated from middle ear fluid before and after the introduction of government subsidies for pneumococcal and H. influenzae type b vaccines in Japan | WPRO       | Japan   | Isolates from paediatric middle ear fluid samples collected from children aged 15 y or younger at Chiba Children's Hospital | Before-after retrospective laboratory -based cohort | 2007-2014              | Children <15 y | 66 pneumococcal isolates from 820 middle ear fluid samples | Yes                                                     | PCV7 in 2010, PCV13 in 2013         | Not described             | 2011-2010                        | 2011-2014                         | Moderate           |

PCV – pneumococcal conjugate vaccine, WPRO – World Health Organization Western Pacific Region, y – years

Table S4. Study characteristics for studies assessing antimicrobial resistance or non-susceptibility in nasopharyngeal carriage isolates

| Study ID                             | First author, year of publication | Title                                                                                                                                                                                                                                 | WHO region | Country  | Study population                                                                                                                          | Study design                                                | Data collection period | Age group          | Number and type of pneumococcal isolates/ infections                                                                                                                                             | Clinical and Laboratory Standards Institute used | PCV10 or PCV13 and vaccine coverage | PCV schedule & catch up                             | Years in the pre-PCV10/13 period | Years in the post-PCV10/13 period | Quality assessment |
|--------------------------------------|-----------------------------------|---------------------------------------------------------------------------------------------------------------------------------------------------------------------------------------------------------------------------------------|------------|----------|-------------------------------------------------------------------------------------------------------------------------------------------|-------------------------------------------------------------|------------------------|--------------------|--------------------------------------------------------------------------------------------------------------------------------------------------------------------------------------------------|--------------------------------------------------|-------------------------------------|-----------------------------------------------------|----------------------------------|-----------------------------------|--------------------|
| <b>Lower middle income countries</b> |                                   |                                                                                                                                                                                                                                       |            |          |                                                                                                                                           |                                                             |                        |                    |                                                                                                                                                                                                  |                                                  |                                     |                                                     |                                  |                                   |                    |
| 16                                   | Kobayashi, 2020 [25]              | Impact of 10-valent pneumococcal conjugate vaccine introduction on pneumococcal carriage and antibiotic susceptibility patterns among children aged <5 years and adults with human immunodeficiency virus infection: Kenya, 2009-2013 | AFRO       | Kenya    | Isolates from cross-sectional pneumococcal carriage surveys were performed in children from Kibera and Lwak, Kenya                        | Comparison of cross-sectional pneumococcal carriage surveys | 2009-2013              | Children aged <5 y | Pneumococcal carriage isolates from Kibera children aged <5 y (n = 499 in 2009, n = 445 in 2013). Pneumococcal carriage isolates from Lwak children aged <5 y (n = 163 in 2009, n = 181 in 2013) | Yes                                              | PCV10 in 2011                       | 3 + 0, catch up in selected sites for children <1 y | 2009                             | 2013                              | Moderate           |
| 31                                   | Turner, 2020 [37]                 | Impact of 13-valent pneumococcal conjugate vaccine on colonization and invasive disease in Cambodian children                                                                                                                         | WPRO       | Cambodia | Carriage isolates from children at the outpatient department of the Angkor Hospital for Children is a nongovernmental paediatric hospital | Before-after retrospective hospital-based cohort            | 2014-2016              | Children <5 y      | 1629 pneumococcal carriage isolates                                                                                                                                                              | Yes                                              | PCV13 in 2015                       | 3 + 0, no catch up                                  | 2014                             | 2016-2018                         | Moderate           |

|                                      |                      |                                                                                                                                                    |      |         |                                                                                                                                      |                                                            |           |                 |                        |            |               |       |           |           |          |
|--------------------------------------|----------------------|----------------------------------------------------------------------------------------------------------------------------------------------------|------|---------|--------------------------------------------------------------------------------------------------------------------------------------|------------------------------------------------------------|-----------|-----------------|------------------------|------------|---------------|-------|-----------|-----------|----------|
|                                      |                      |                                                                                                                                                    |      |         | located in the north western city of Siem Reap. The hospital, and an associated satellite clinic at Sot Nikom district hospital.     |                                                            |           |                 |                        |            |               |       |           |           |          |
| <b>Lower middle income countries</b> |                      |                                                                                                                                                    |      |         |                                                                                                                                      |                                                            |           |                 |                        |            |               |       |           |           |          |
| 19                                   | Mayanskiy, 2017 [38] | Serotypes and antimicrobial susceptibility of nasopharyngeal pneumococci isolated from children in 2010-2016: a retrospective cohort study         | EURO | Russia  | Nasopharyngeal pneumococci isolated from children getting care at the National Medical Research Center of Children's Health (Moscow) | Before-after retrospective hospital-based cohort           | 2010-2016 | Children <18 y  | 484 carriage isolates  | Yes        | PCV13 in 2014 | 2 + 1 | 2010/11   | 2016      | Moderate |
| 20                                   | Mayanskiy, 2019 [28] | Changing serotype distribution and resistance patterns among paediatric nasopharyngeal pneumococci collected in Moscow, 2010-2017                  | EURO | Russia  | Nasopharyngeal pneumococci isolated from children getting care at the National Medical Research Center of Children's Health (Moscow) | Before-after retrospective hospital-based cohort           | 2010-2017 | Children <5 y   | 631 carriage isolates  | Yes        | PCV13 in 2014 | 2 + 1 | 2010/11   | 2017      | Moderate |
| <b>High income countries</b>         |                      |                                                                                                                                                    |      |         |                                                                                                                                      |                                                            |           |                 |                        |            |               |       |           |           |          |
| 23                                   | Quirk, 2019 [30]     | Effect of vaccination on pneumococci isolated from the nasopharynx of healthy children and the middle ear of children with otitis media in Iceland | EURO | Iceland | Nasopharyngeal swabs were taken from healthy children attending 15 DCCs, chosen to be representative of the greater Reykjavik area   | Before-after health facility-based cross-sectional surveys | 2009-2017 | Children 1-17 y | 3020 carriage isolates | Not stated | PCV13 in 2011 | 2 + 1 | 2009-2011 | 2012-2017 | Moderate |

PCV – pneumococcal conjugate vaccine, AFRO – World Health Organization African Region, EURO - World Health Organization European Region, WPRO - World Health Organization Western Pacific Region

Table S5. Study characteristics for studies assessing antimicrobial resistance or non-susceptibility in other (sputum or mixed invasive and non-invasive pneumococcal) isolates

| Study ID                     | First author, year of publication | Title                                                                                                                                             | WHO Region | Country | Study population                                                                                                                                  | Study design                      | Data collection period | Age group                     | Number and type of pneumococcal isolates/ infections                                                                 | Clinical and Laboratory Standards Institute used | PCV10 or PCV13 and vaccine coverage | PCV schedule and catch up | Years in the pre-PCV10/13 period | Years in the post-PCV10/13 period | Quality assessment |
|------------------------------|-----------------------------------|---------------------------------------------------------------------------------------------------------------------------------------------------|------------|---------|---------------------------------------------------------------------------------------------------------------------------------------------------|-----------------------------------|------------------------|-------------------------------|----------------------------------------------------------------------------------------------------------------------|--------------------------------------------------|-------------------------------------|---------------------------|----------------------------------|-----------------------------------|--------------------|
| <b>High income countries</b> |                                   |                                                                                                                                                   |            |         |                                                                                                                                                   |                                   |                        |                               |                                                                                                                      |                                                  |                                     |                           |                                  |                                   |                    |
| 26                           | Shoji, 2017 [32]                  | Serotype distribution of Streptococcus pneumoniae isolated from adult respiratory tract infections in nationwide Japanese surveillances 2006-2014 | WPRO       | Japan   | The Japanese Society of Chemotherapy (JSC) nationwide surveillance network of the antimicrobial susceptibility of bacterial respiratory pathogens | Prospective national surveillance | 2006-2014              | Adults >18 y, median age 73 y | 1086 Streptococcus pneumoniae strains isolated from sputum and specimens of transtracheal aspiration or bronchoscopy | Not stated                                       | PCV13 (following PCV7)              | 3 + 1, no catch up        | 2006-2010                        | 2012-2014                         | Moderate           |

|    |                     |                                                                                                                                                                                                                                                                                       |      |         |                                                                                                                                                                                                                                                                                                                      |                                                  |           |               |                                                     |            |                             |                                       |           |           |          |
|----|---------------------|---------------------------------------------------------------------------------------------------------------------------------------------------------------------------------------------------------------------------------------------------------------------------------------|------|---------|----------------------------------------------------------------------------------------------------------------------------------------------------------------------------------------------------------------------------------------------------------------------------------------------------------------------|--------------------------------------------------|-----------|---------------|-----------------------------------------------------|------------|-----------------------------|---------------------------------------|-----------|-----------|----------|
| 27 | Sivhonen, 2017 [33] | Streptococcus pneumoniae antimicrobial resistance decreased in the Helsinki Metropolitan Area after routine 10-valent pneumococcal conjugate vaccination of infants in Finland                                                                                                        | EURO | Finland | Clinical invasive (isolated from the blood or the cerebrospinal fluid) and non-invasive (all others, e.g. from ear, eye, nose, throat, maxillary sinus, trachea, bronchus, sputum, or abscess) S. pneumoniae isolates routinely identified at HUSLAB (Hospital District of Helsinki and Uusimaa Laboratory Services) | Before-after retrospective hospital-based cohort | 2009-2014 | Children <5 y | 3040 non-invasive and 1254 IPD isolates             | Not stated | PCV10                       | 2 + 1, no catch up campaign described | 2009      | 2014      | Moderate |
| 29 | Suzuki, 2017 [35]   | Impact of the introduction of a 13-valent pneumococcal vaccine on pneumococcal serotypes in non-invasive isolates 2007-2016 at a teaching hospital in Japan                                                                                                                           | WPRO | Japan   | Pneumococcal isolates collected at the Tokyo Medical University Hachioji Medical Center                                                                                                                                                                                                                              | Before-after retrospective hospital-based cohort | 2007-2016 | All ages      | 618 invasive and non-invasive pneumococcal isolates | Yes        | PCV7 in 2010, PCV13 in 2013 | 3 + 1, no catch up                    | 2006-2010 | 2012-2014 | Moderate |
| 30 | Toda, 2018 [36]     | Laboratory surveillance of antimicrobial resistance and multidrug resistance among Streptococcus pneumoniae isolated in the Kinki region of Japan, 2001e2015: Comparison of the prevalence of drug-resistant strains before and after introduction of conjugated pneumococcal vaccine | WPRO | Japan   | Streptococcus pneumoniae collected from 21 medical institutions in the Kinki region that belong to the Study of Bacterial Resistance in the Kinki Region of Japan                                                                                                                                                    | Before-after retrospective hospital-based cohort | 2001-2016 | All ages      | 4354 pneumococcal isolates                          | Yes        | PCV7 in 2010, PCV13 in 2013 | 3 + 1, no catch up                    | 2001-2002 | 2001-2016 | Moderate |

PCV – pneumococcal conjugate vaccine, IPD – invasive pneumococcal disease, EURO – World Health Organization European Region, WPRO – World Health Organization Western Pacific Region
